# Supplementary material
Source: HighWire-hosted journal article supplement (http://www.ghspjournal.org/highwire/filestream/1601/field_highwire_adjunct_files/1/Supplementary_material-2.pdf)

**PROTECT YOURSELF  
PROTECT YOUR FAMILY  
PROTECT YOUR COMMUNITY**

Against the **Ebola** Virus Disease

✓ **DO**

✗ **DO NOT**

- |                                                                                                                                                                                                                               |                                                                                                                                                                                                                                               |
|-------------------------------------------------------------------------------------------------------------------------------------------------------------------------------------------------------------------------------|-----------------------------------------------------------------------------------------------------------------------------------------------------------------------------------------------------------------------------------------------|
|  <p>Always Wash your hands with soap and clean water</p>                                                                                   |  <p>Do not touch people with signs of or have died of Ebola</p>                                                                                          |
|  <p>Always cook your food properly</p>                                                                                                     |  <p>Do not touch clothes &amp; bed cloths of people Who have died of Ebola</p>                                                                           |
|  <p>Go to the Health Facility anytime you have headache, Pain, Diarrhea, red eyes rash and vomiting</p>                                    |  <p>Do not touch vomit, Saliva, Urine, blood and poo poo of people who have signs and symptoms of Ebola</p>                                              |
|  <p>Tell anyone you meet about Ebola so they can be informed</p>                                                                           |  <p>Do not play with Monkeys and Baboons</p>                                                                                                             |
|  <p>Call these numbers if you need help for help :<br/>0886229641<br/>0886397381<br/>0776547437<br/>1333 (Lonestar)<br/>4455 (Cellcom)</p> |  <p>Do not eat bush meat</p>  <p>Do not eat plums eaten by bats</p> |

Let's stop the spread of Ebola Together

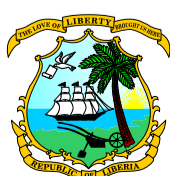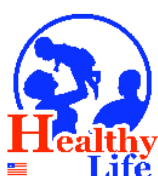

**act:onaid** Liberia

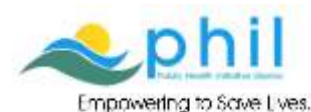

Supplement: Supplementary_material-2.pdf [file Supplementary_material-2.pdf]
